# Supplementary material
Source: PubMed Central journal article supplement (PMC7606494)

A

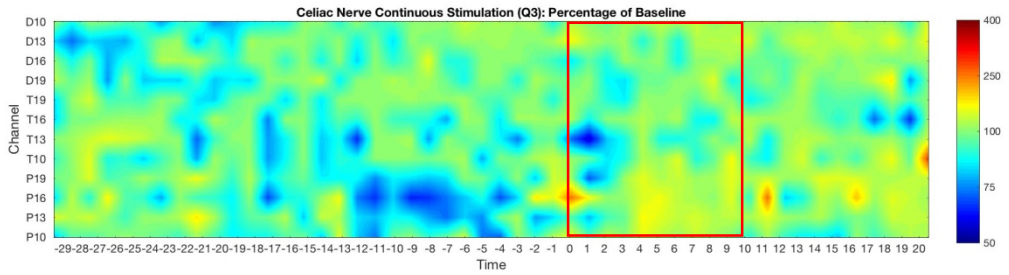

B

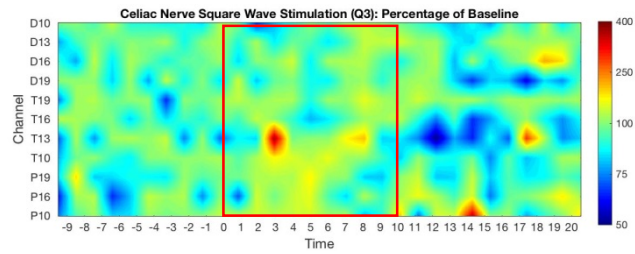

Supplement: NIHMS1614096-supplement-Supplemental_Figure_3.pdf [file NIHMS1614096-supplement-Supplemental_Figure_3.pdf]

A

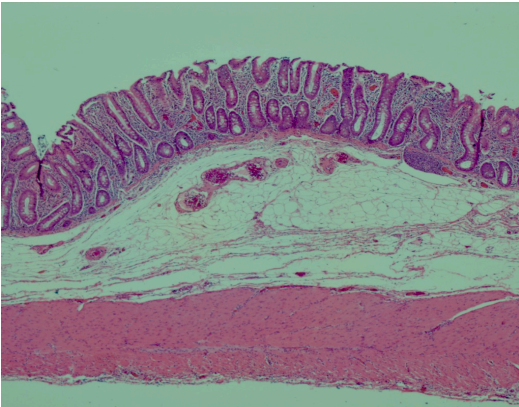

Non-stimulated site

B

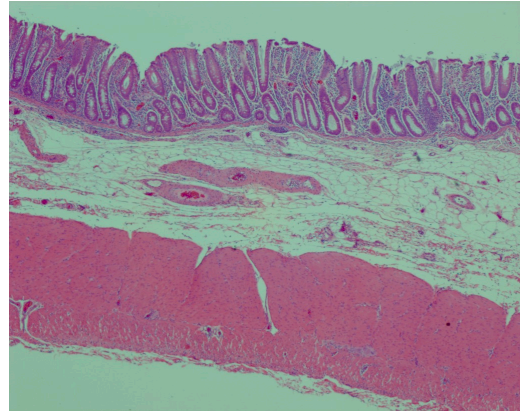

Stimulated site

Supplement: NIHMS1614096-supplement-Supplemental_Figure_4.pdf [file NIHMS1614096-supplement-Supplemental_Figure_4.pdf]
